# Supplementary material
Source: PubMed Central journal article supplement (PMC6404538)

**Supplemental Figure 1.** Schematic presentation of species-specific RNAseq (SSRS) analysis pipeline.

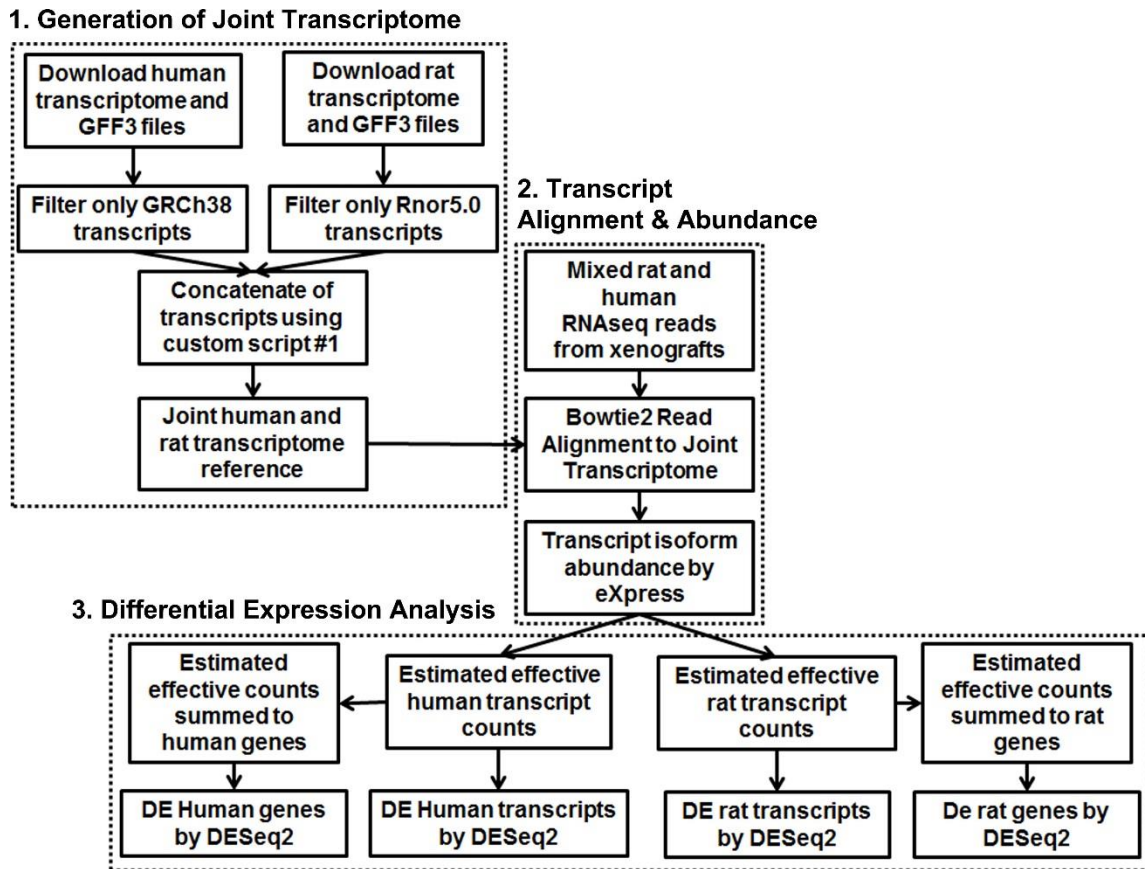

**Supplemental Figure 2.** Transcript expression levels of the luciferase transgene (GenBank accession U47295) that is stably expressed by the 231<sup>Luc+</sup> cells, as determined by SSRS. Data are presented as the mean estimated counts  $\pm$  SEM from 231<sup>Luc+</sup> tumors implanted in SS.BN3<sup>IL2R $\gamma$</sup>  (n=4) and SS<sup>IL2R $\gamma$</sup>  (n=4) rats.

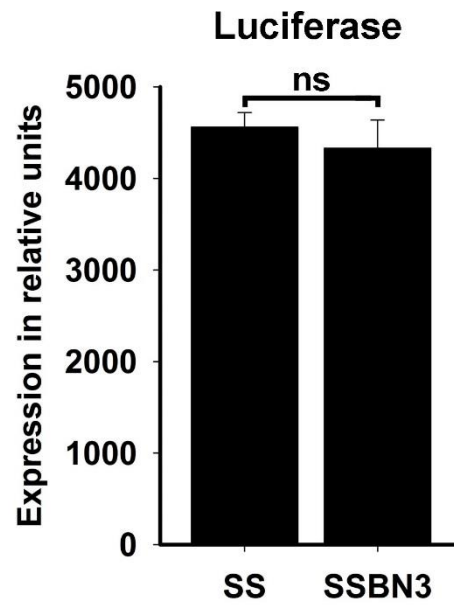

**Supplemental Figure 3.** Inhibition of the DLL4 signaling pathway by DAPT increases branch points in a tube formation assay of rat endothelial cells. Data are presented as the mean estimated counts  $\pm$  SEM from endothelial cells derived from the SS and SSBN3 rat strains (n = 17-22 per group). \* $P$ <0.05 and \*\* $P$ <0.01, as determined by ANOVA followed by the Holm-Sidak multiple comparison test.

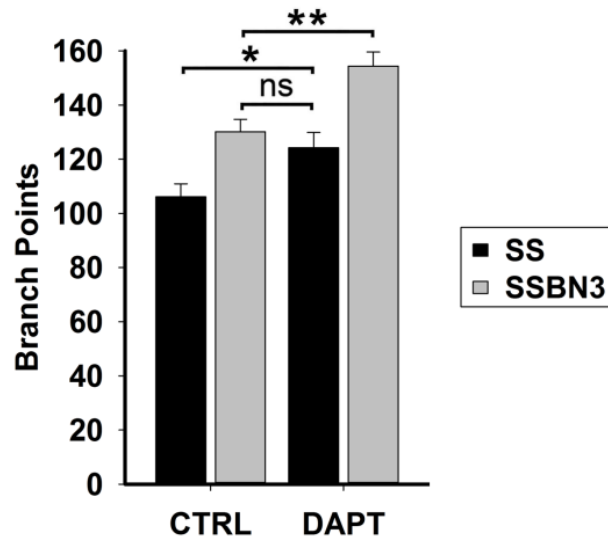

Supplement: NIHMS941444-supplement-Figures.pdf [file NIHMS941444-supplement-Figures.pdf]
